# Supplementary material
Source: PubMed Central journal article supplement (PMC3082778)
Supplement: NIHMS32232-supplement-1.pdf [file NIHMS32232-supplement-1.pdf]

| #  | Tissue / cell type    | Age (average) | Gender | Pool of |
|----|-----------------------|---------------|--------|---------|
| 1  | heart muscle          | 25 Y          | female | 3       |
| 2  | heart muscle          | 23 Y          | male   | 3       |
| 3  | heart muscle          | 25 Y          | male   | 3       |
| 4  | heart muscle          | 78 Y          | male   | 3       |
| 5  | heart muscle          | 74 Y          | male   | 3       |
| 6  | heart muscle          | 62 Y          | male   | 3       |
| 7  | skeletal muscle       | 19 Y          | male   | 3       |
| 8  | skeletal muscle       | 30 Y          | male   | 3       |
| 9  | skeletal muscle       | 22 Y          | male   | 3       |
| 10 | skeletal muscle       | 59 Y          | male   | 3       |
| 11 | skeletal muscle       | 67 Y          | male   | 3       |
| 12 | skeletal muscle       | 74 Y          | male   | 3       |
| 13 | skeletal muscle       | 65 Y          | female | 3       |
| 14 | skeletal muscle       | 67 Y          | female | 3       |
| 15 | skeletal muscle       | 84 Y          | female | 2       |
| 16 | liver                 | 23 Y          | male   | 3       |
| 17 | liver                 | 23 Y          | male   | 3       |
| 18 | liver                 | 30 Y          | male   | 3       |
| 19 | liver                 | 82 Y          | male   | 3       |
| 20 | liver                 | 65 Y          | male   | 3       |
| 21 | liver                 | 74 Y          | male   | 3       |
| 22 | liver                 | 70 Y          | female | 3       |
| 23 | liver                 | 81 Y          | female | 3       |
| 24 | sperm                 | 24 Y          | male   | 3       |
| 25 | fetal skeletal muscle | 23 W          | male   | 3       |
| 26 | fetal liver           | 24 W          | male   | 3       |
| 27 | placenta              | NB            | female | 3       |
| 28 | melanocytes           | 30 Y          | female | 1       |
| 29 | melanocytes           | 41 Y          | female | 1       |
| 30 | melanocytes           | 42 Y          | female | 1       |
| 31 | dermal fibroblasts    | 43 Y          | female | 2       |
| 32 | dermal fibroblasts    | 41 Y          | female | 2       |
| 33 | dermal fibroblasts    | 39 Y          | female | 2       |
| 34 | dermal keratinocytes  | 43 Y          | female | 3       |
| 35 | dermal keratinocytes  | 39 Y          | female | 3       |
| 36 | dermal keratinocytes  | 33 Y          | female | 2       |
| 37 | CD4 lymphocytes       | 20 Y          | male   | 1       |
| 38 | CD8 lymphocytes       | 59 Y          | male   | 1       |
| 39 | CD8 lymphocytes       | 60/61 Y       | female | 1       |
| 40 | CD8 lymphocytes       | 62 Y          | male   | 1       |
| 41 | CD4 lymphocytes       | 59/60 Y       | female | 1       |
| 42 | CD4 lymphocytes       | 61 Y          | female | 1       |
| 43 | CD4 lymphocytes       | 62 Y          | female | 1       |

**Table S1**
