# Supplementary material
Source: PubMed Central journal article supplement (PMC3082778)
Supplement: NIHMS32232-supplement-2.pdf [file NIHMS32232-supplement-2.pdf]

| Gene                                                     | Ensembl ID         | CD4+ Lymphocytes | CD8+ Lymphocytes | Embryonic liver | embryonic skeletal muscle | Fibroblasts | Heart muscle | Keratinocytes | Liver | Melanocytes | Placenta | Skeletal muscle | Sperm |
|----------------------------------------------------------|--------------------|------------------|------------------|-----------------|---------------------------|-------------|--------------|---------------|-------|-------------|----------|-----------------|-------|
| ZNRF3                                                    | ENSG00000183579    | 90               | 90               | 80              | 30                        | 80          | 70           | 90            | 90    | 90          | 60       | 30              | 100   |
| SLC7A4                                                   | OTTHUMG00000030129 | 0                | 0                | 0               | 0                         | 0           | 0            | 10            | 10    | 50          | 10       | 0               | 0     |
| Myosin-18B (MYO18B)                                      | ENSG00000133454    | 100              | 90               | 80              | 40                        | 90          | 60           | 90            | 90    | 90          | 50       | 40              | NA    |
| glycoprotein Ib (platelet), beta polypeptide             | OTTHUMT00000075045 | 10               | 10               | 10              | 70                        | 90          | 20           | 40            | 10    | 50          | 70       | 80              | 0     |
| RP1-47A17.8                                              | OTTHUMG00000030878 | 80               | 80               | 70              | 20                        | 20          | 80           | 90            | 80    | 70          | 70       | 60              | 90    |
| Oncostatin M (OSM)                                       | ENSG00000099985    | 0                | 0                | 40              | 90                        | 90          | 90           | 100           | 90    | 100         | 90       | 90              | 90    |
| CTA-299D3.6                                              | OTTHUMG00000030140 | 90               | 90               | 80              | 70                        | 70          | 70           | 90            | 80    | 30          | 70       | 70              | 100   |
| CTA-941F9.6                                              | OTTHUMG00000030231 | 90               | 90               | 90              | 80                        | 90          | 90           | 10            | 80    | 90          | 90       | 80              | 90    |
| Cytohesin-4                                              | ENSG00000100055    | 0                | 0                | 30              | 50                        | 50          | 50           | 10            | 50    | 60          | 30       | 50              | 90    |
| PIB5PA                                                   | ENSG00000185133    | 60               | 70               | 60              | 10                        | 10          | 10           | 10            | 20    | 10          | 10       | 10              | 60    |
| SUSD2                                                    | ENSG00000099994    | 100              | 90               | 80              | 40                        | 50          | 80           | 40            | 60    | 50          | 60       | 50              | 90    |
| No gene associated                                       | NA                 | 90               | 90               | 80              | 30                        | 10          | 40           | 10            | 60    | 60          | 20       | 20              | 90    |
| RP3-438O4.2                                              | OTTHUMG00000030922 | 90               | 90               | 90              | 30                        | 10          | 70           | 20            | 80    | 20          | 20       | 20              | 90    |
| RP4-756G23.1                                             | OTTHUMG00000030852 | 90               | 90               | 80              | 50                        | 50          | 80           | 80            | 90    | 20          | 70       | 50              | 90    |
| Somatostatin receptor type 3 (SSTR3)                     | ENSG00000183473    | 90               | 90               | 80              | 30                        | 10          | 20           | 40            | 30    | 20          | 20       | 20              | 90    |
| Bcl-2 interacting killer (BIK)                           | ENSG00000100290    | 20               | 40               | 40              | 50                        | 80          | 80           | 90            | 80    | 80          | 80       | 50              | 90    |
| GAS2L1                                                   | ENSG00000185340    | 90               | 90               | 90              | 80                        | 80          | 80           | 10            | 90    | 90          | 90       | 70              | 20    |
| RP3-355C18.2                                             | OTTHUMG00000030072 | 60               | 60               | 80              | 70                        | 60          | 80           | 10            | 70    | 80          | 50       | 50              | 100   |
| Gamma-parvin                                             | ENSG00000138964    | 30               | 20               | 70              | 90                        | 90          | 90           | 90            | 80    | 90          | 80       | 90              | 100   |
| CARMA 3                                                  | ENSG00000100065    | 100              | 100              | 90              | NA                        | 80          | 90           | 80            | 100   | 90          | 80       | 50              | 100   |
| TMPRSS6                                                  | ENSG00000187045    | 10               | 30               | 50              | 0                         | 10          | 30           | 60            | 80    | 10          | 30       | 0               | 0     |
| Platelet-derived growth factor B chain precursor (PDGFB) | ENSG00000100311    | 20               | 20               | 20              | 0                         | 50          | 30           | 10            | 70    | 70          | 20       | 20              | 0     |
| CELSR1 Cadherin                                          | ENSG00000075275    | 10               | 10               | 40              | 60                        | 70          | 70           | 80            | 80    | 80          | 80       | 60              | 0     |
| T-box transcription factor (TBX1)                        | ENSG00000184058    | 10               | 10               | NA              | 40                        | 80          | 10           | 0             | 20    | 70          | 80       | 70              | NA    |
| Q6ZRW2_HUMAN                                             | ENSG00000178199    | 40               | 30               | 70              | 30                        | 30          | 60           | 20            | 80    | 40          | 60       | 20              | 100   |
| NKG2DL4 (RAET1E)                                         | ENSG00000164520    | 70               | 90               | 70              | 70                        | 50          | 80           | 0             | 100   | 70          | 50       | 50              | 100   |

|                                               |                     |     |     |     |    |     |     |     |     |     |    |     |     |
|-----------------------------------------------|---------------------|-----|-----|-----|----|-----|-----|-----|-----|-----|----|-----|-----|
| DAAM2                                         | ENSG00000146122     | 90  | 90  | 90  | 60 | 90  | 90  | 90  | 20  | 90  | 90 | 80  | 100 |
| RP1-47M23.1                                   | OTTHUMG00000015313  | 10  | 0   | 20  | 40 | 40  | 80  | 70  | 40  | 60  | 60 | 60  | 90  |
| RP11-397G17.1                                 | OTTHUMG00000014829  | 90  | 90  | 80  | 90 | 80  | 90  | 20  | 50  | 80  | 70 | 80  | 90  |
| Nesprin-1 (Syne-1)                            | ENSG00000131018     | 100 | 100 | 70  | NA | 10  | 20  | 10  | 40  | 0   | 60 | 20  | 90  |
| Myogenic repressor I-mf (MDFI)                | ENSG00000112559     | 80  | 80  | 50  | 50 | 80  | 40  | 0   | 50  | 60  | 50 | 80  | 0   |
| RP11-174C7.4                                  | OTTHUMG00000015553  | 80  | 80  | 80  | 40 | 0   | 50  | 70  | 80  | 50  | 40 | 30  | 80  |
| CMAH                                          | OTTHUMG00000016099  | 90  | 100 | 90  | 80 | 90  | 90  | 0   | 90  | 100 | 90 | 80  | 0   |
| PKHD1                                         | ENSG00000170927     | 90  | 80  | 70  | 50 | 40  | 50  | 10  | 40  | 30  | 50 | 60  | 100 |
| glutathione peroxidase 5 (GPX5)               | OTTHUMG00000016307  | 20  | 10  | 30  | 80 | 40  | 50  | 90  | 70  | 40  | 80 | 70  | 100 |
| GRIK2                                         | ENSG00000164418     | 10  | 20  | 10  | 10 | 80  | 20  | 90  | 10  | 70  | 50 | 10  | 10  |
| SLC22A1                                       | ENSG00000112499     | 100 | 100 | 100 | 90 | 100 | 100 | 100 | 60  | 100 | 90 | 100 | 100 |
| RP11-235G24.1                                 | OTTHUMG00000015959  | 90  | 90  | 80  | 90 | 50  | 80  | 90  | 60  | 70  | 80 | 90  | 80  |
| TBX18                                         | ENSG00000112837     | 10  | 20  | 0   | 40 | 90  | 30  | 10  | 20  | 60  | 40 | 60  | 10  |
| TGM3                                          | ENSG00000125780     | 90  | 80  | 70  | NA | 70  | 70  | 30  | 90  | 80  | 50 | 40  | 90  |
| RIN2                                          | OTTHUMG000000031996 | 30  | 50  | 40  | 20 | 20  | 20  | 90  | 90  | 20  | 30 | 10  | NA  |
| SLC24A3                                       | OTTHUMG000000031993 | 100 | 100 | 100 | 60 | 90  | 80  | 90  | 90  | 90  | NA | 50  | NA  |
| Q9ULE8_HUMAN                                  | ENSG00000188559     | 100 | 100 | 80  | NA | 90  | 100 | 0   | 60  | 100 | 90 | 100 | 100 |
| C20orf117                                     | OTTHUMG000000032395 | 80  | 90  | 70  | 10 | 0   | 30  | 10  | 50  | 10  | 20 | 40  | 10  |
| Breast carcinoma amplified sequence 4 (BCAS4) | ENSG00000124243     | 10  | 10  | 10  | 20 | 20  | 20  | 10  | 20  | 70  | 20 | 30  | 80  |
| nuclear factor of activated T-cells (NFATC2)  | OTTHUMG000000032747 | 100 | 90  | 90  | 40 | 10  | 70  | 10  | 50  | 10  | 40 | 40  | 100 |
| SCUBE1                                        | ENSG00000159307     | 10  | 10  | 0   | 40 | 70  | 60  | 50  | 20  | 80  | 60 | 70  | 70  |
| JAG1                                          | ENSG00000101384     | 100 | 100 | 100 | 90 | 100 | 90  | 10  | 100 | 100 | 40 | 30  | 100 |

**Table S2**
