# Supplementary material
Source: PubMed Central journal article supplement (PMC3082778)
Supplement: NIHMS32232-supplement-8.pdf [file NIHMS32232-supplement-8.pdf]

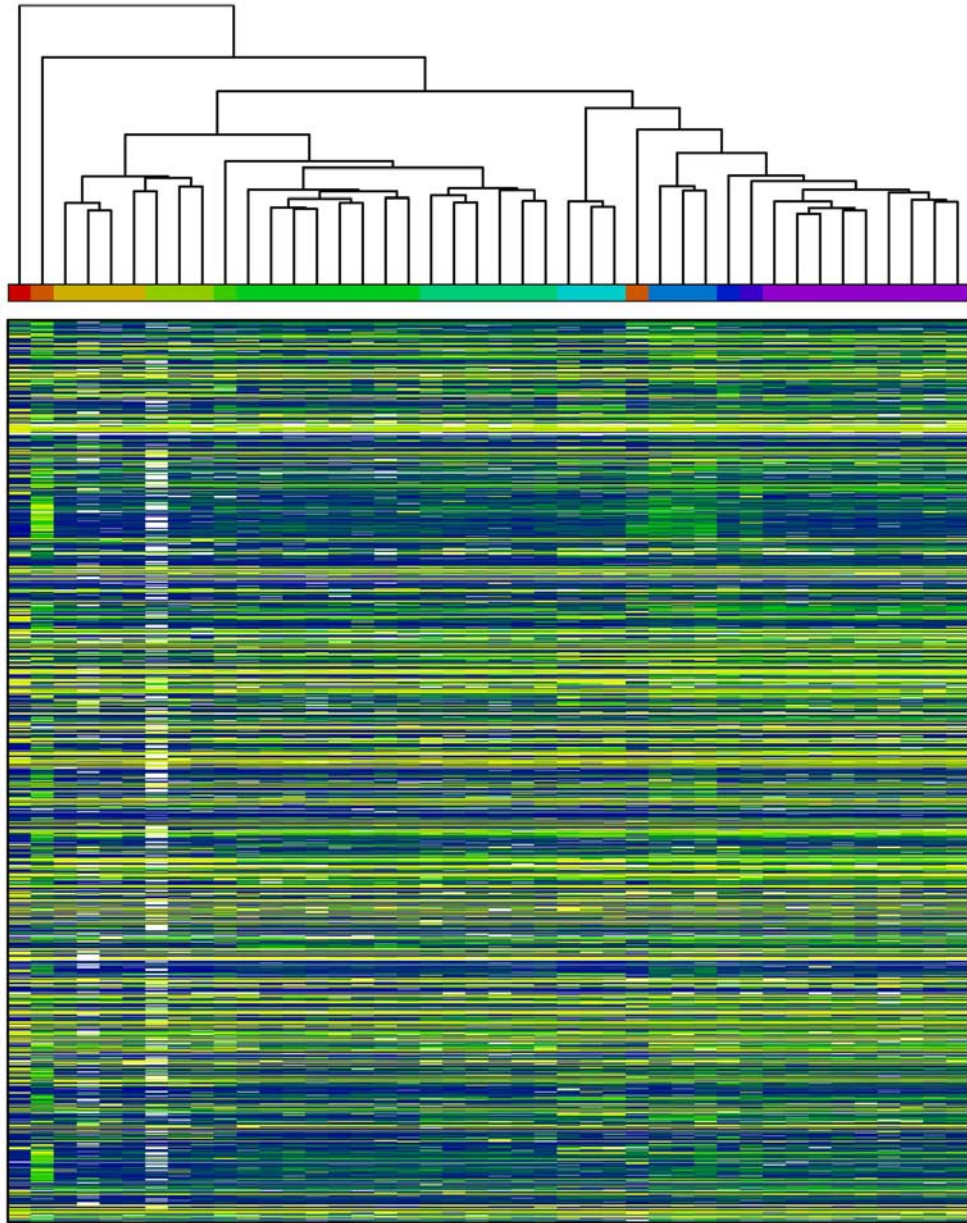

Sperm  
 Melanocytes  
 CD4 Lymphocytes  
 CD4 Lymphocytes  
 CD4 Lymphocytes  
 CD4 Lymphocytes  
 CD8 Lymphocytes  
 CD8 Lymphocytes  
 CD8 Lymphocytes  
 Fetal liver  
 Heart muscle  
 Heart muscle  
 Heart muscle  
 Heart muscle  
 Heart muscle  
 Keratinocytes  
 Keratinocytes  
 Keratinocytes  
 Melanocytes  
 Fibroblasts  
 Fibroblasts  
 Fibroblasts  
 Fetal skel. muscle  
 Placenta  
 Skeletal muscle  
 Skeletal muscle

0 % 50 % 100 %

Degree of methylation
