# Supplementary material
Source: PubMed Central journal article supplement (PMC3082778)

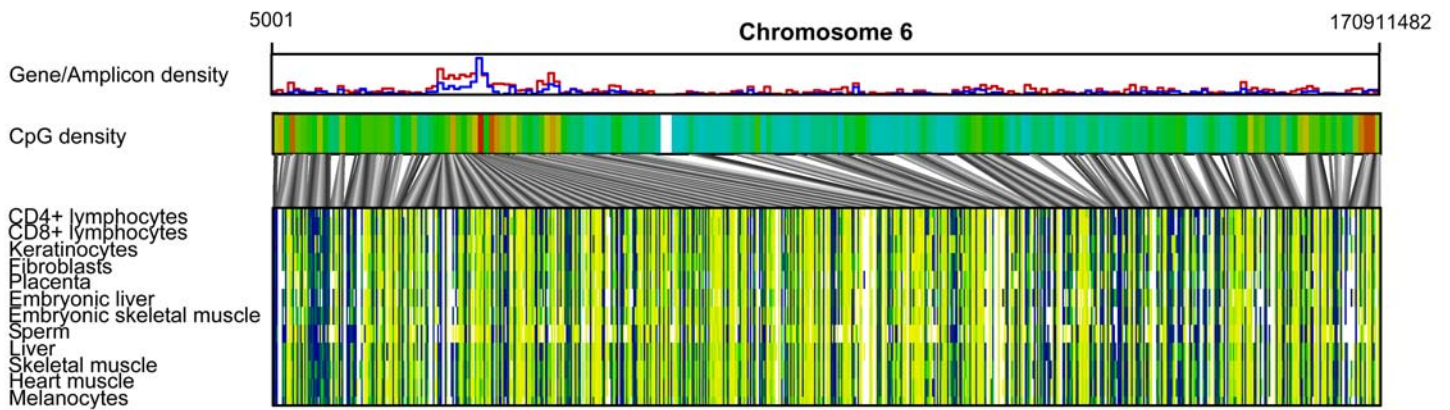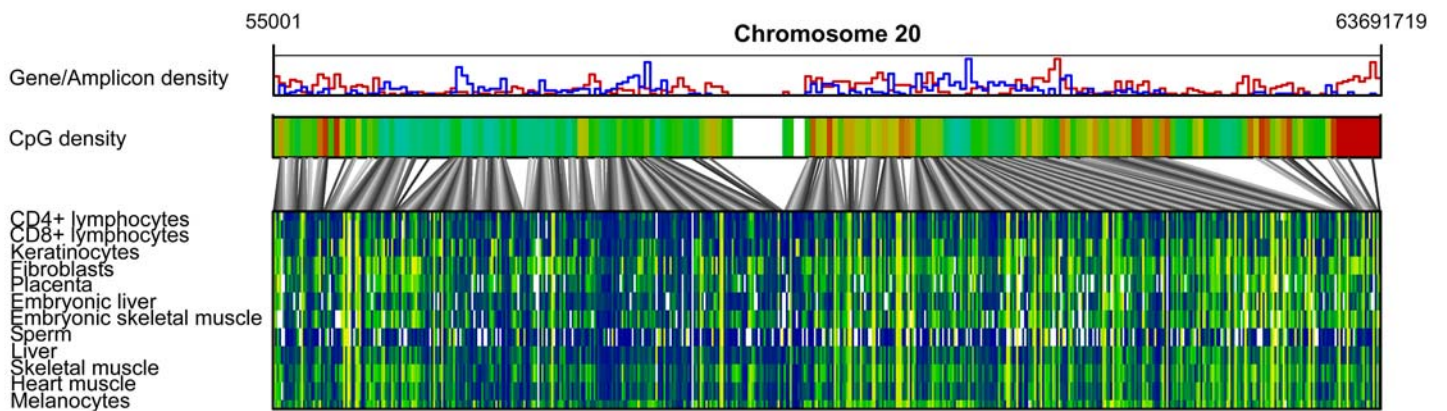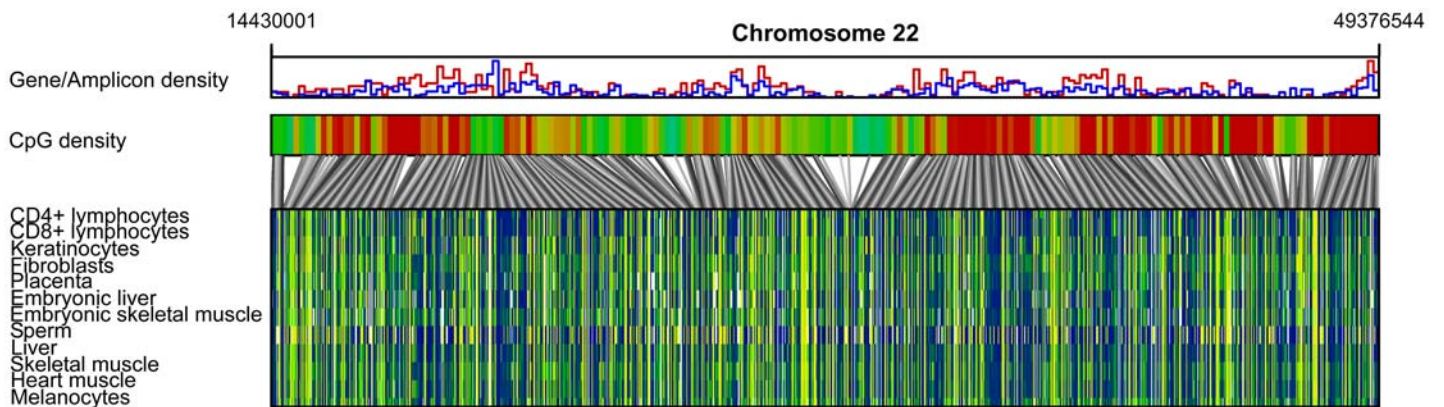

Supplement: NIHMS32232-supplement-3.pdf [file NIHMS32232-supplement-3.pdf]

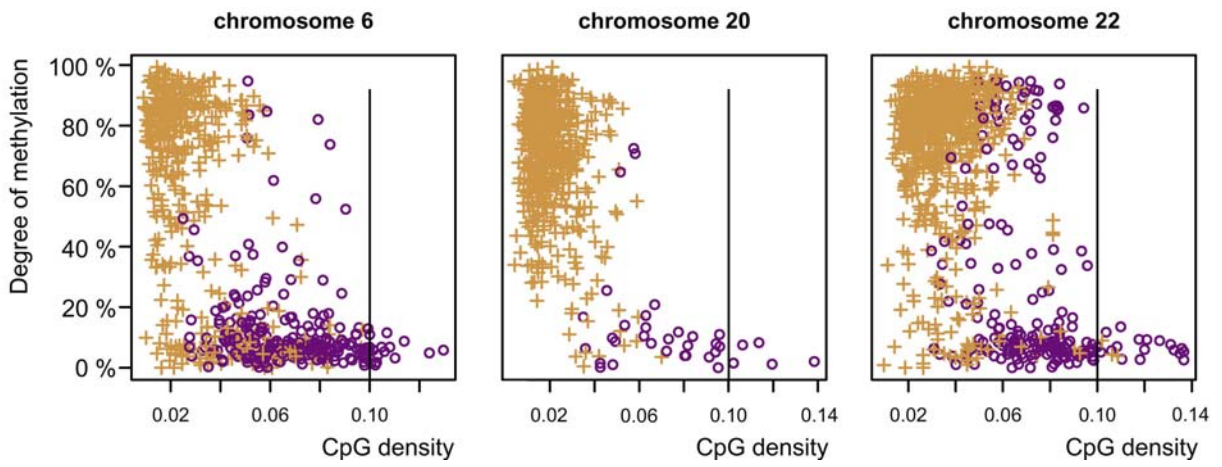

Supplement: NIHMS32232-supplement-4.pdf [file NIHMS32232-supplement-4.pdf]

## SLC22A1

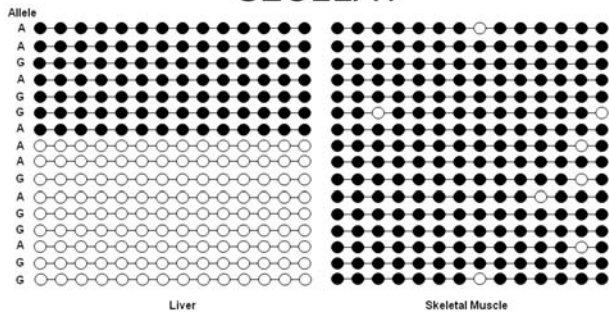

chr6: 160,462,994-160,463,482

## GNAS1

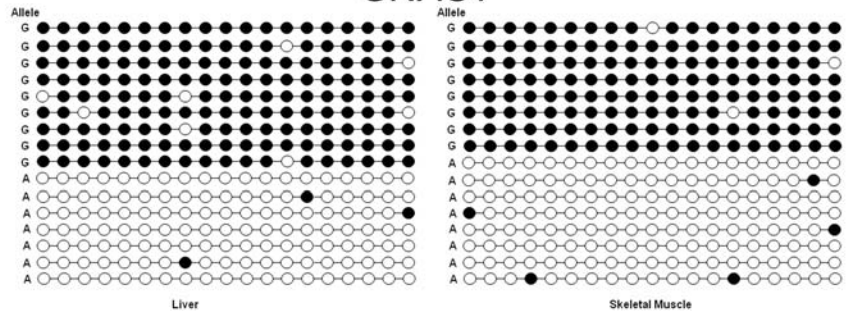

chr20: 56,849,119 - 56,849,467

Supplement: NIHMS32232-supplement-5.pdf [file NIHMS32232-supplement-5.pdf]

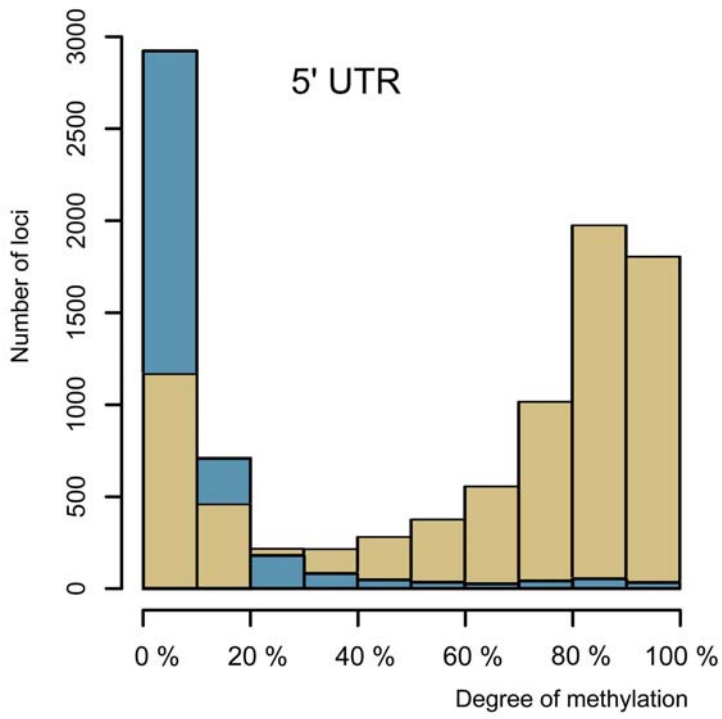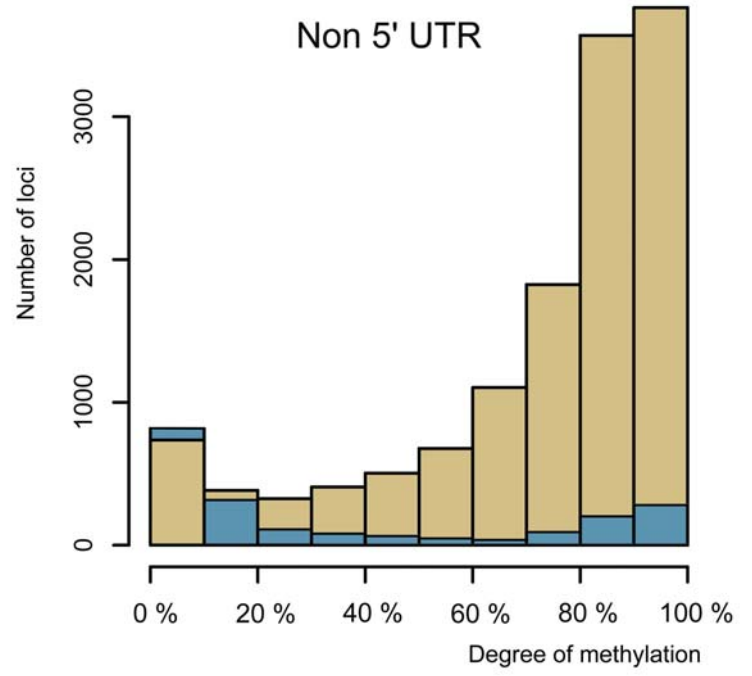

Supplement: NIHMS32232-supplement-6.pdf [file NIHMS32232-supplement-6.pdf]
